# Supplementary material for: High-Resolution Small RNAs Landscape Provides Insights into Alkane Adaptation in the Marine Alkane-Degrader Alcanivorax dieselolei B-5
Source: MDPI journal article supplement (doi:10.3390/ijms232415995), 2022-12-15
Supplement: s1 [file s1]

# Sequence logos of the nearby 10-nt sequences of RNase E cleavage sites in previous studies

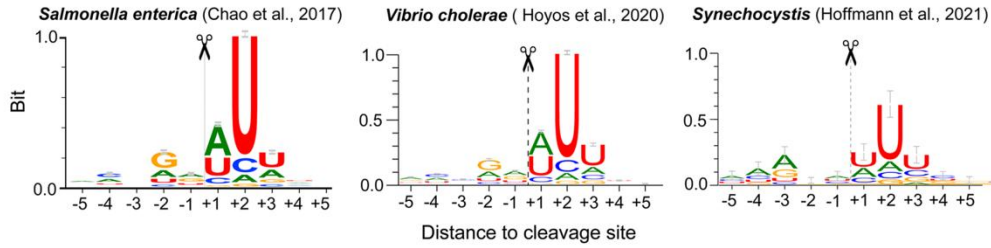

## Crutial residues for RNase E-specific cleavage are highly conserved in *A. dieselolei* and other bacteria

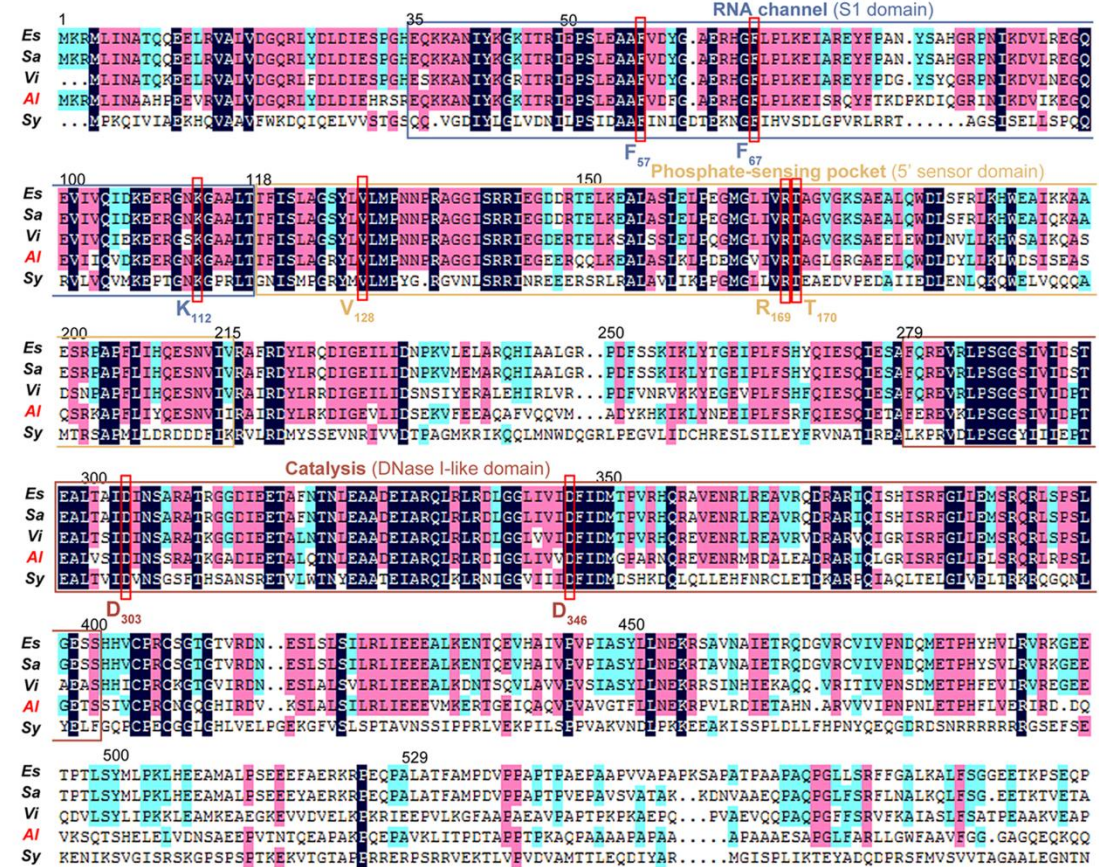

Figure S1 Sequence logos of the TSSs and PSSs, and key residues in RNase E of different species

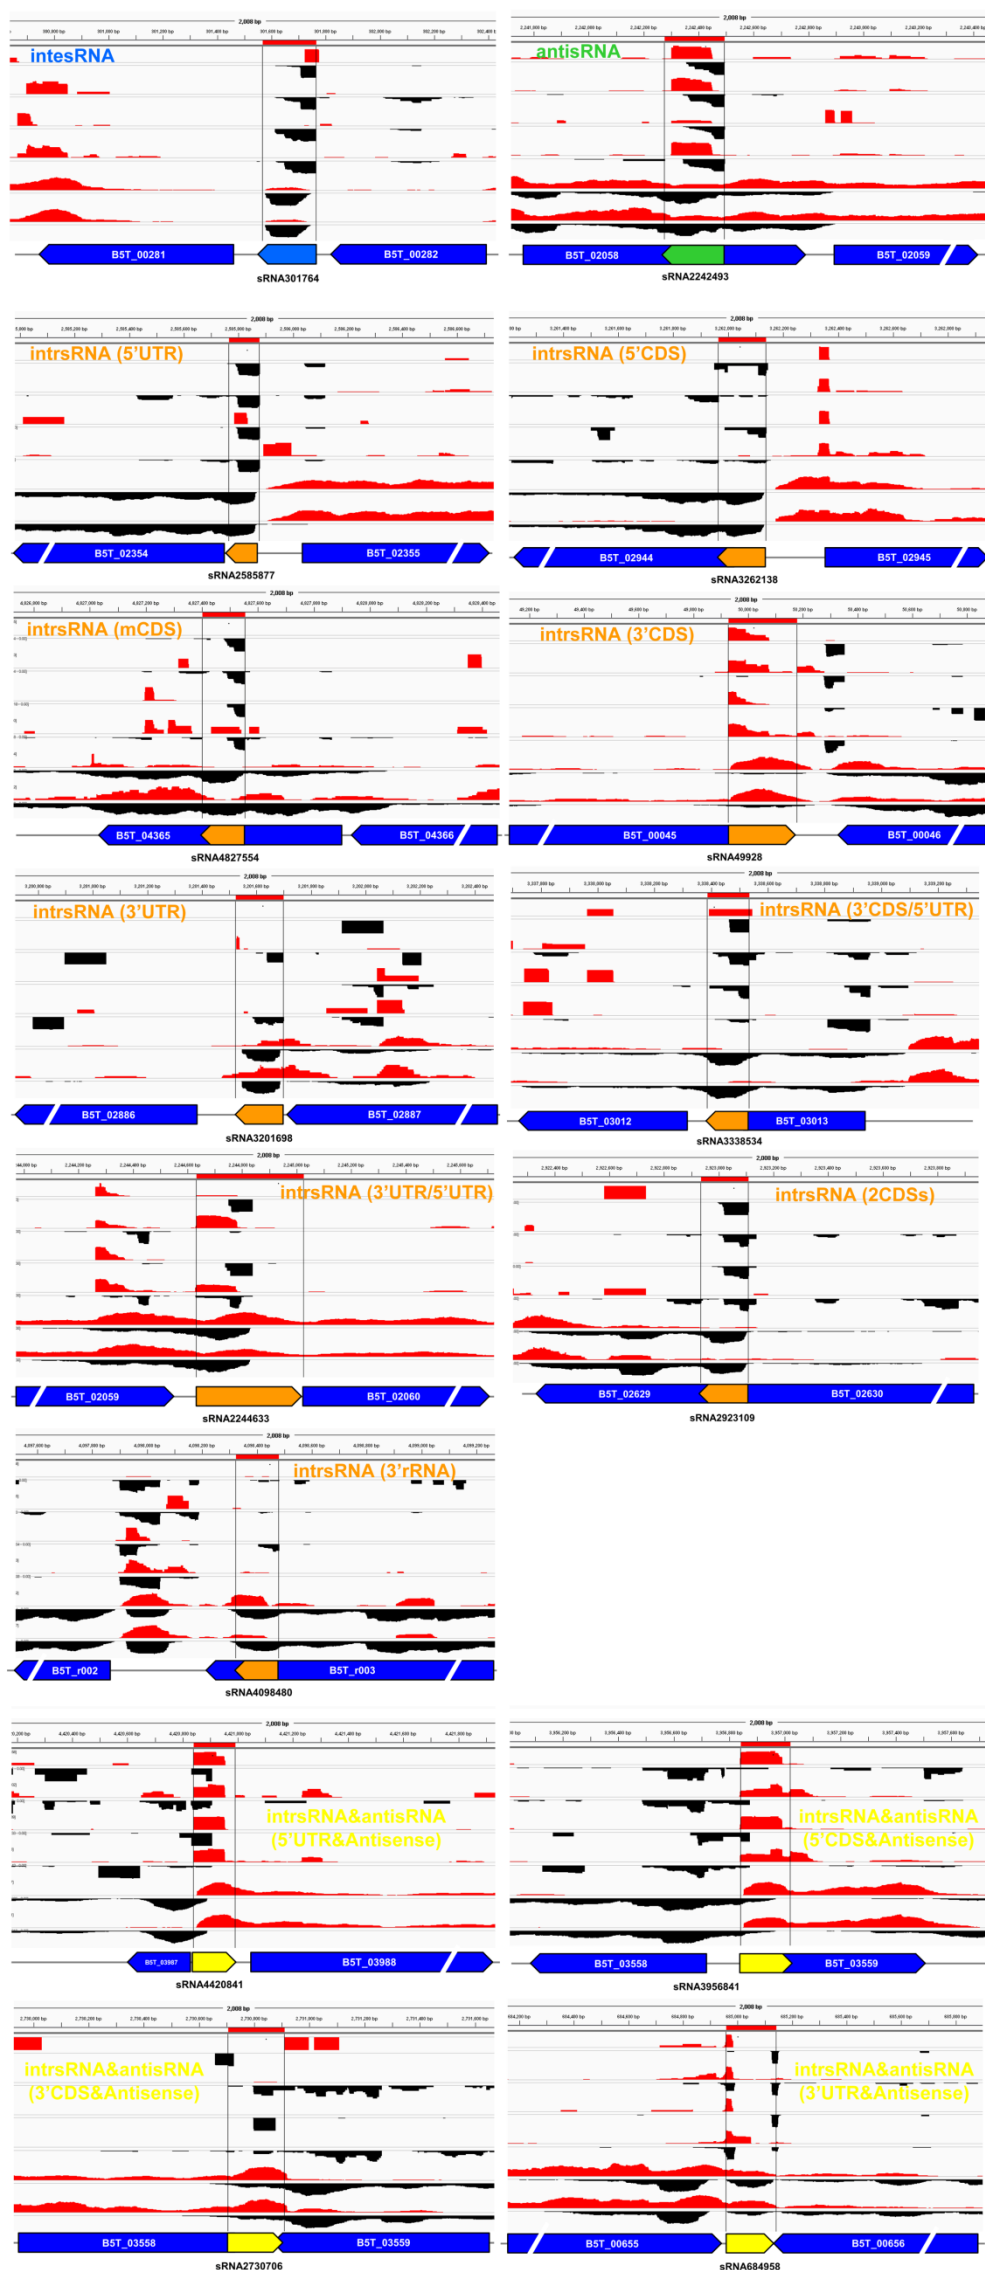

**Figure S2 Examples of peak plots of different sRNA classifications based on the genomic locations**



The detected read peaks and TSSs of pRNA and 6S RNA in dRNA-seq and ssRNA-seq

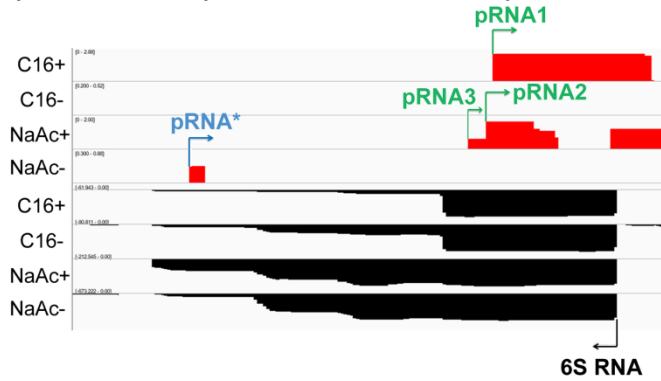

The related TSSs in the predicted secondary structure of 6S RNA

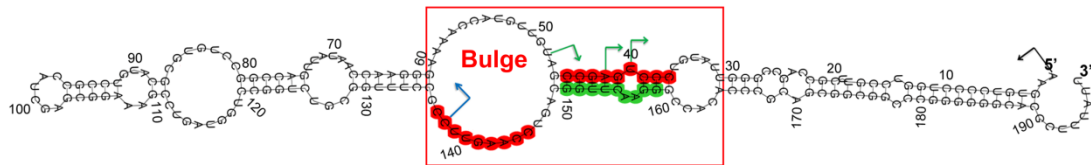

Figure S3 Putative pRNAs of 6S RNA in *A. dieselolei*

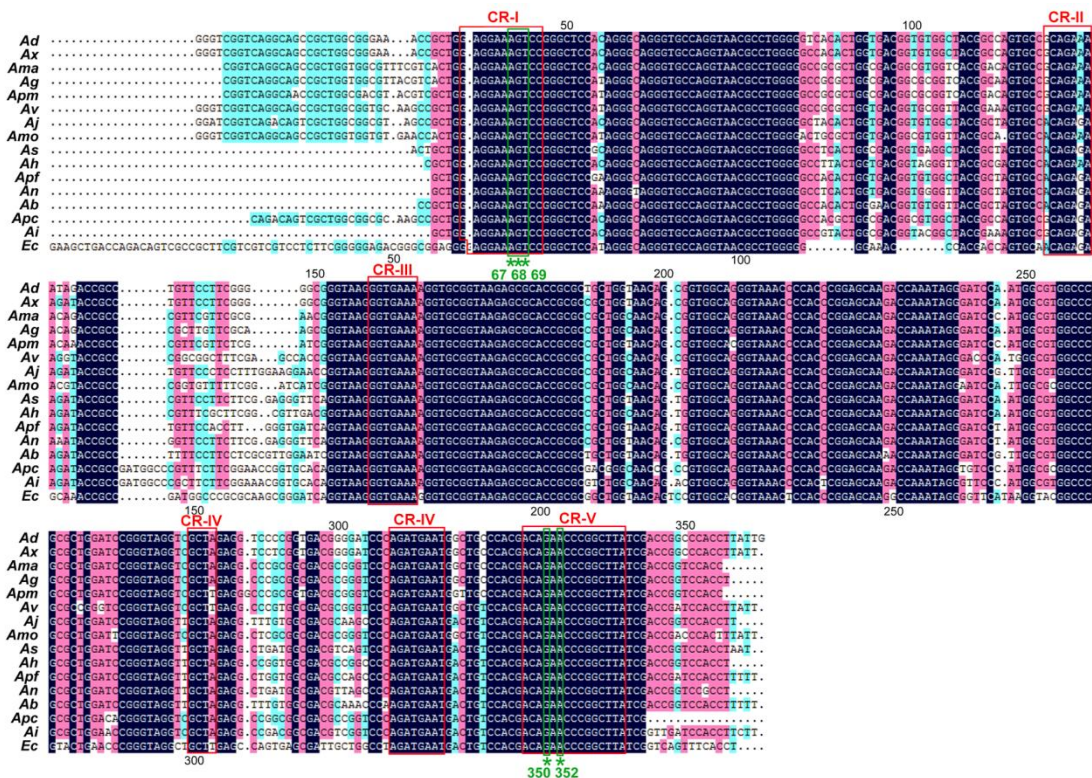

Figure S4 Conserved regions (CR-I to CR-V) and active sites (\*) of M1 RNAs in different *Alcanivorax* species

## Sequence analyzing of tmRNA upstream gene in *Alcanivorax*

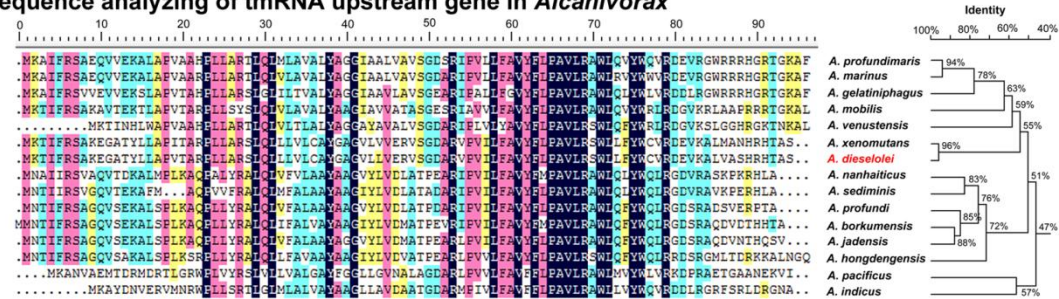

## Expressions of tmRNA upstream gene in *A. dieselolei* B5

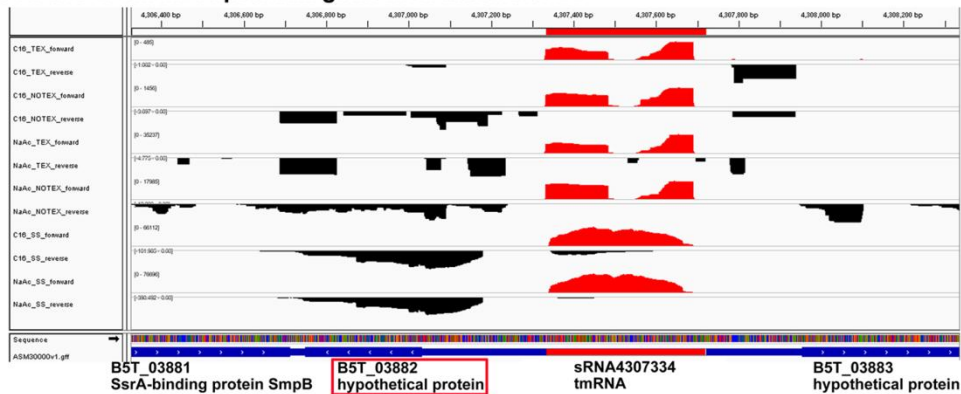

## Comparison of tmRNA MLD in *Alcanivorax* and *E. coli*

| <i>E. coli</i>                                   | <i>Alcanivorax</i>                                         |
|--------------------------------------------------|------------------------------------------------------------|
| Nts: GCA AAC GAC GAA AAC TAC GCT TTA GCA GCT TAA | Nts: GCA/T AAC GAC GAT A/TCT TAC GCA CTG/A GCG/A GCC/T TAA |
| AAs: Ala Asn Asp Glu Asn Tyr Ala Leu Ala Ala *** | AAs: Ala Asn Asp Asp Thr/Ser Tyr Ala Leu Ala Ala ***       |

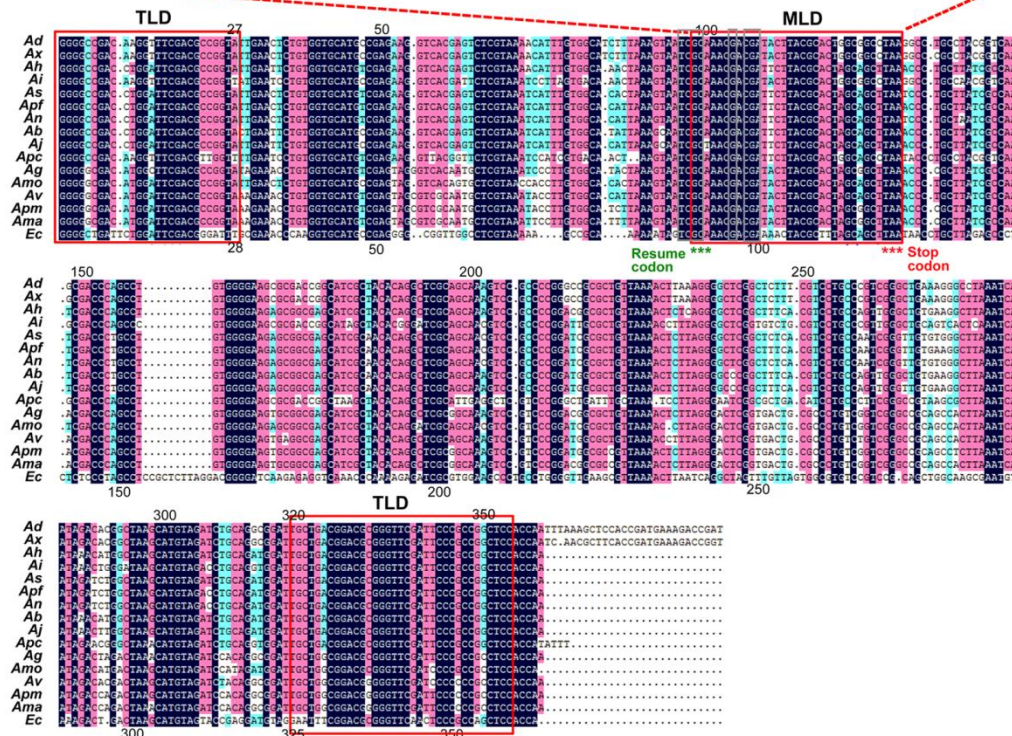

Figure S5 tmRNA upstream gene and MLD features in different *Alcanivorax* species





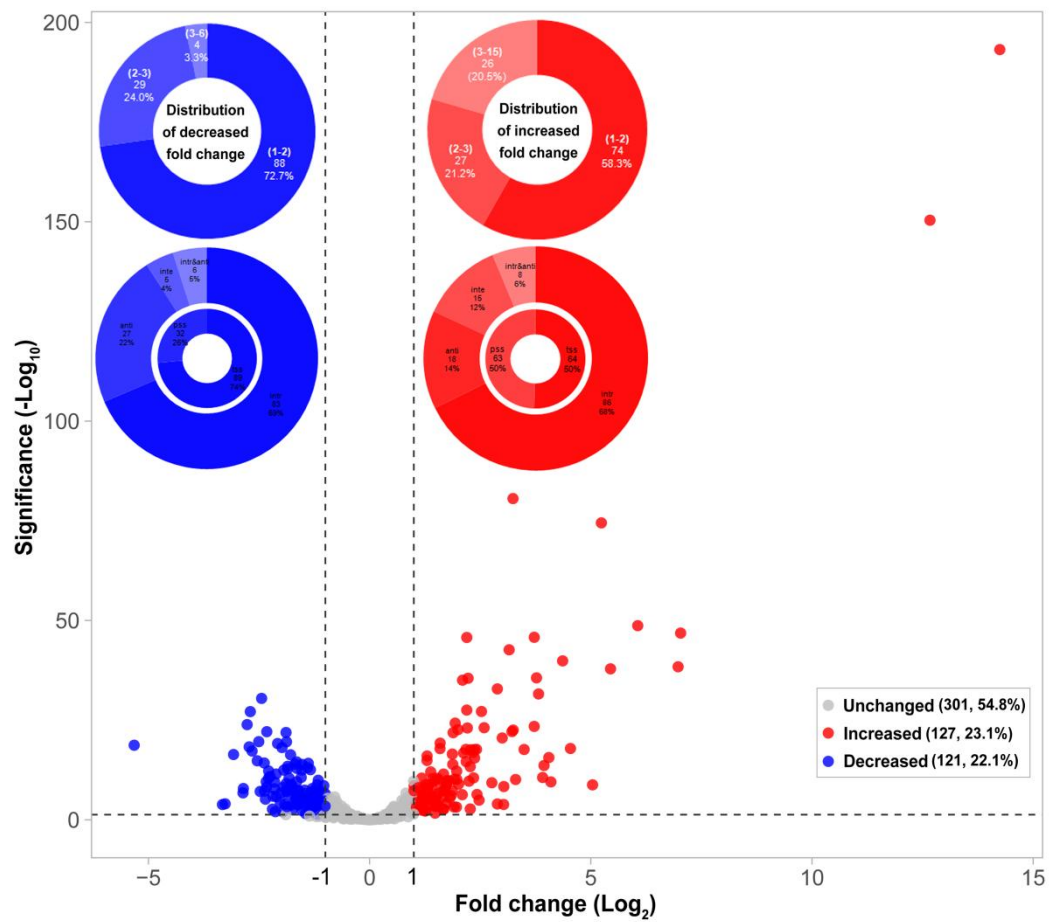

**Figure S8** Volcano plots showing the differential expression in alkane versus acetate conditions
